# Supplementary material for: The effect of amidation on the behaviour of antimicrobial peptides
Source: PubMed Central journal article supplement (PMC4796345; doi:10.1007/s00249-015-1094-x), 2016-01-08
Supplement: 249_2015_1094_MOESM1_ESM.pdf [file 249_2015_1094_MOESM1_ESM.pdf]

## The effect of amidation on the behaviour of antimicrobial peptides

Manuela Mura\*<sup>2</sup> and Jianping Wang<sup>1</sup> ·  
Yuhua Zhou<sup>1</sup> · Marco Pinna<sup>2</sup> ·  
Andrei V. Zvelindovsky<sup>2</sup> · Sarah R.  
Dennison<sup>3,4</sup> · David A. Phoenix<sup>4</sup>

December 1, 2015

---

<sup>1</sup> UCLan Biomedical Technology Limited (Shenzhen), Shenzhen Virtual University Park, Shenzhen, 518057 P. R. China · <sup>2</sup> Computational Physics Group, School of Mathematics and Physics, University of Lincoln, Brayford Pool, Lincoln, LN6 7TS · <sup>3</sup> School of Pharmacy and Biomedical Science, University of Central Lancashire, Preston PR1 2HE, UK · <sup>4</sup> School of Applied Science, London South Bank University, 103 Borough Road, London SE1 0AA, UK

| Peptide              | Method               | Reference set | $\alpha 1$ | $\alpha 2$ | Total | Peptide | Method               | Reference set | $\alpha 1$           | $\alpha 2$ | Total |       |       |       |       |
|----------------------|----------------------|---------------|------------|------------|-------|---------|----------------------|---------------|----------------------|------------|-------|-------|-------|-------|-------|
| Aurein 2.6-COOH DMPC | CDSSTR               |               | 3.00       | 37.00      | 12.00 | 49.00   | Aurein 2.6-CONH DMPC | CDSSTR        |                      | 3.00       | 36.00 | 19.00 | 55.00 |       |       |
|                      |                      |               | 4.00       | 29.00      | 19.00 | 48.00   |                      |               |                      | 4.00       | 39.00 | 19.00 | 58.00 |       |       |
|                      |                      |               | 7.00       | 24.00      | 23.00 | 47.00   |                      |               |                      | 7.00       | 36.00 | 24.00 | 60.00 |       |       |
|                      |                      |               | SP175      | 30.00      | 17.00 | 47.00   |                      |               |                      | SP175      | 36.00 | 19.00 | 55.00 |       |       |
|                      |                      |               | SMP180     | 30.00      | 17.00 | 47.00   |                      |               |                      | SMP180     | 32.00 | 8.00  | 40.00 |       |       |
|                      | CONTIN               |               | 3.00       | 33.50      | 17.00 | 50.50   |                      | CONTIN        |                      | 3.00       | 33.50 | 16.50 | 50.00 |       |       |
|                      |                      |               | 4.00       | 30.10      | 16.90 | 47.00   |                      |               |                      | 4.00       | 33.50 | 26.50 | 60.00 |       |       |
|                      |                      |               | 7.00       | 30.90      | 14.60 | 45.50   |                      |               |                      | 7.00       | 33.50 | 26.50 | 60.00 |       |       |
|                      |                      |               | SP175      | 28.10      | 25.50 | 53.60   |                      |               |                      | SP175      | 38.90 | 21.80 | 60.70 |       |       |
|                      |                      |               | SMP180     | 28.70      | 20.40 | 49.10   |                      |               |                      | SMP180     | 33.70 | 16.40 | 50.10 |       |       |
|                      | SELCON3              |               | 3.00       | 20.00      | 24.00 | 44.00   |                      | SELCON3       |                      | 3.00       | 43.20 | 12.60 | 55.80 |       |       |
|                      |                      |               | 4.00       | 20.80      | 27.80 | 48.60   |                      |               |                      | 4.00       | 49.30 | 13.00 | 62.30 |       |       |
|                      |                      |               | 7.00       | 29.80      | 18.90 | 48.70   |                      |               |                      | 7.00       | 47.90 | 12.70 | 60.60 |       |       |
|                      |                      |               | SP175      | 27.30      | 18.50 | 45.80   |                      |               |                      | SP175      | 41.10 | 11.40 | 52.50 |       |       |
|                      |                      |               | SMP180     | 26.70      | 14.10 | 40.80   |                      |               |                      | SMP180     | 49.70 | 11.80 | 61.50 |       |       |
|                      |                      |               |            |            | av    | 47.44   |                      |               |                      |            | av    | 56.10 |       |       |       |
|                      |                      |               |            |            | SD    | 2.91    |                      |               |                      |            | sd    | 6.01  |       |       |       |
|                      | Aurein 2.6-COOH DMPS | CDSSTR        |            | 3.00       | 44.00 | 4.00    |                      | 48.00         | Aurein 2.6-CONH DMPS | CDSSTR     |       | 3.00  | 36.00 | 20.00 | 56.00 |
|                      |                      |               |            | 4.00       | 34.00 | 11.00   |                      | 45.00         |                      |            |       | 4.00  | 40.00 | 18.00 | 58.00 |
|                      |                      |               |            | 7.00       | 36.00 | 11.00   |                      | 47.00         |                      |            |       | 7.00  | 41.00 | 15.00 | 56.00 |
|                      |                      |               | SP175      | 36.00      | 9.00  | 45.00   |                      | SP175         |                      |            | 41.00 | 14.00 | 55.00 |       |       |
|                      |                      |               | SMP180     | 39.00      | 19.00 | 58.00   |                      | SMP180        |                      |            | 29.00 | 15.00 | 44.00 |       |       |
| CONTIN               |                      |               | 3.00       | 31.30      | 12.80 | 44.10   | CONTIN               |               |                      | 3.00       | 47.20 | 13.00 | 60.20 |       |       |
|                      |                      |               | 4.00       | 32.00      | 13.00 | 45.00   |                      |               |                      | 4.00       | 47.20 | 13.00 | 60.20 |       |       |
|                      |                      |               | 7.00       | 32.30      | 11.60 | 43.90   |                      |               |                      | 7.00       | 39.20 | 12.30 | 51.50 |       |       |
|                      |                      |               | SP175      | 32.80      | 11.80 | 44.60   |                      |               |                      | SP175      | 29.10 | 13.00 | 42.10 |       |       |
|                      |                      |               | SMP180     | 36.80      | 13.60 | 50.40   |                      |               |                      | SMP180     | 29.00 | 31.00 | 60.00 |       |       |
| SELCON3              |                      |               | 3.00       | 31.50      | 14.10 | 45.60   | SELCON3              |               |                      | 3.00       | 47.00 | 21.80 | 68.80 |       |       |
|                      |                      |               | 4.00       | 31.90      | 15.30 | 47.20   |                      |               |                      | 4.00       | 40.30 | 21.60 | 61.90 |       |       |
|                      |                      |               | 7.00       | 31.20      | 14.10 | 45.30   |                      |               |                      | 7.00       | 43.00 | 16.70 | 59.70 |       |       |
|                      |                      |               | SP175      | 28.60      | 13.00 | 41.60   |                      |               |                      | SP175      | 48.60 | 14.50 | 63.10 |       |       |
|                      |                      |               | SMP180     | 26.90      | 12.70 | 39.60   |                      |               |                      | SMP180     | 48.60 | 14.50 | 63.10 |       |       |
|                      |                      |               |            |            | av    | 46.02   |                      |               |                      |            | av    | 57.31 |       |       |       |
|                      |                      |               |            |            | SD    | 4.17    |                      |               |                      |            | sd    | 7.08  |       |       |       |

**Fig. 1** The CD secondary structure of aureins 2.6 in Water and TFE fitted using CDSSTR, CONTIN and SELCON3.

| Peptide               | Method              | Reference set | $\alpha 1$ | $\alpha 2$ | Total  | Peptide               | Method  | Reference set       | $\alpha 1$ | $\alpha 2$ | Total |
|-----------------------|---------------------|---------------|------------|------------|--------|-----------------------|---------|---------------------|------------|------------|-------|
| Aurein 2.6-COOH water | CDSSTR              | 3.00          | 4.30       | 9.10       | 13.40  | Aurein 2.6-CONH water | CDSSTR  | 3.00                | 4.30       | 9.10       | 13.40 |
|                       |                     | 4.00          | 5.50       | 11.20      | 16.70  |                       |         | 4.00                | 0.70       | 0.50       | 1.20  |
|                       |                     | 7.00          | 1.80       | 1.00       | 2.80   |                       |         | 7.00                | 0.18       | 0.18       | 0.36  |
|                       |                     | SP175         | 0.00       | 7.60       | 7.60   |                       |         | SP175               | 0.00       | 7.60       | 7.60  |
|                       |                     | SMP180        | 0.50       | 0.39       | 0.89   |                       |         | SMP180              | 0.00       | 0.86       | 0.86  |
|                       | CONTIN              | 3.00          | 0.00       | 8.50       | 8.50   |                       | CONTIN  | 3.00                | 0.00       | 0.98       | 0.98  |
|                       |                     | 4.00          | 0.20       | 7.00       | 7.20   |                       |         | 4.00                | 0.00       | 8.70       | 8.70  |
|                       |                     | 7.00          | 0.30       | 1.40       | 1.70   |                       |         | 7.00                | 0.00       | 5.90       | 5.90  |
|                       |                     | SP175         | 0.20       | 0.50       | 0.70   |                       |         | SP175               | 0.00       | 10.20      | 10.20 |
|                       |                     | SMP180        | 0.00       | 0.79       | 0.79   |                       |         | SMP180              | 1.90       | 6.70       | 8.60  |
|                       | SELCON3             | 3.00          | 0.10       | 0.20       | 0.30   |                       | SELCON3 | 3.00                | 4.00       | 3.00       | 7.00  |
|                       |                     | 4.00          | 1.00       | 8.00       | 9.00   |                       |         | 4.00                | -1.00      | 11.00      | 10.00 |
|                       |                     | 7.00          | 1.00       | 2.00       | 3.00   |                       |         | 7.00                | 0.00       | 2.00       | 2.00  |
|                       |                     | SP175         | 0.00       | 0.00       | 0.00   |                       |         | SP175               | 1.00       | 3.00       | 4.00  |
|                       |                     | SMP180        | 0.00       | 0.00       | 0.00   |                       |         | SMP180              | 0.00       | 1.00       | 1.00  |
|                       |                     |               |            | av         | 4.84   |                       |         |                     | av         | 5.45       |       |
|                       |                     |               |            | SD         | 5.29   |                       |         |                     | sd         | 4.25       |       |
|                       | Aurein 2.6-COOH TFE | CDSSTR        | 3.00       | 57.00      | 17.00  |                       | 74.00   | Aurein 2.6-CONH TFE | CDSSTR     | 3.00       | 51.00 |
| 4.00                  |                     |               | 61.00      | 14.00      | 75.00  | 4.00                  | 61.00   |                     |            | 16.00      | 77.00 |
| 7.00                  |                     |               | 56.00      | 16.00      | 72.00  | 7.00                  | 50.00   |                     |            | 21.00      | 71.00 |
| SP175                 |                     |               | 61.00      | 17.00      | 78.00  | SP175                 | 60.00   |                     |            | 17.00      | 77.00 |
| SMP180                |                     |               | 65.00      | 10.00      | 75.00  | SMP180                | 50.00   |                     |            | 19.00      | 69.00 |
| CONTIN                |                     | 3.00          | 47.00      | 26.60      | 73.60  | CONTIN                | 3.00    |                     | 53.35      | 27.60      | 80.95 |
|                       |                     | 4.00          | 54.70      | 23.30      | 78.00  |                       | 4.00    |                     | 53.60      | 28.40      | 82.00 |
|                       |                     | 7.00          | 46.10      | 28.90      | 75.00  |                       | 7.00    |                     | 52.90      | 28.40      | 81.30 |
|                       |                     | SP175         | 46.10      | 28.90      | 75.00  |                       | SP175   |                     | 54.10      | 29.50      | 83.60 |
|                       |                     | SMP180        | 46.10      | 28.90      | 75.00  |                       | SMP180  |                     | 54.10      | 29.50      | 83.60 |
| SELCON3               |                     | 3.00          | 54.00      | 61.00      | 115.00 | SELCON3               | 3.00    |                     | 48.40      | 24.80      | 73.20 |
|                       |                     | 4.00          | 52.60      | 24.50      | 77.10  |                       | 4.00    |                     | 45.80      | 23.10      | 68.90 |
|                       |                     | 7.00          | 52.60      | 24.50      | 77.10  |                       | 7.00    |                     | 45.80      | 23.10      | 68.90 |
|                       |                     | SP175         | 55.00      | 25.00      | 80.00  |                       | SP175   |                     | 33.00      | 20.50      | 53.50 |
|                       |                     | SMP180        | 45.40      | 22.30      | 67.70  |                       | SMP180  |                     | 47.90      | 13.70      | 61.60 |
|                       |                     |               |            | av         | 77.83  |                       |         |                     | av         | 73.50      |       |
|                       |                     |               |            | SD         | 10.68  |                       |         |                     | sd         | 8.59       |       |

**Fig. 2** The CD secondary structure of aureins3.1 in Water and TFE fitted using CDSSTR, CONTIN and SELCON3.

| Peptide              | Method               | Reference set | $\alpha 1$ | $\alpha 2$ | Total | Peptide              | Method  | Reference set        | $\alpha 1$ | $\alpha 2$ | Total |
|----------------------|----------------------|---------------|------------|------------|-------|----------------------|---------|----------------------|------------|------------|-------|
| Aurein 2.6-COOH DMPC | CDSSTR               | 3.00          | 37.00      | 12.00      | 49.00 | Aurein 2.6-CONH DMPC | CDSSTR  | 3.00                 | 36.00      | 19.00      | 55.00 |
|                      |                      | 4.00          | 29.00      | 19.00      | 48.00 |                      |         | 4.00                 | 39.00      | 19.00      | 58.00 |
|                      |                      | 7.00          | 24.00      | 23.00      | 47.00 |                      |         | 7.00                 | 36.00      | 24.00      | 60.00 |
|                      |                      | SP175         | 30.00      | 17.00      | 47.00 |                      |         | SP175                | 36.00      | 19.00      | 55.00 |
|                      |                      | SMP180        | 30.00      | 17.00      | 47.00 |                      |         | SMP180               | 32.00      | 8.00       | 40.00 |
|                      | CONTIN               | 3.00          | 33.50      | 17.00      | 50.50 |                      | CONTIN  | 3.00                 | 33.50      | 16.50      | 50.00 |
|                      |                      | 4.00          | 30.10      | 16.90      | 47.00 |                      |         | 4.00                 | 33.50      | 26.50      | 60.00 |
|                      |                      | 7.00          | 30.90      | 14.60      | 45.50 |                      |         | 7.00                 | 33.50      | 26.50      | 60.00 |
|                      |                      | SP175         | 28.10      | 25.50      | 53.60 |                      |         | SP175                | 38.90      | 21.80      | 60.70 |
|                      |                      | SMP180        | 28.70      | 20.40      | 49.10 |                      |         | SMP180               | 33.70      | 16.40      | 50.10 |
|                      | SELCON3              | 3.00          | 20.00      | 24.00      | 44.00 |                      | SELCON3 | 3.00                 | 43.20      | 12.60      | 55.80 |
|                      |                      | 4.00          | 20.80      | 27.80      | 48.60 |                      |         | 4.00                 | 49.30      | 13.00      | 62.30 |
|                      |                      | 7.00          | 29.80      | 18.90      | 48.70 |                      |         | 7.00                 | 47.90      | 12.70      | 60.60 |
|                      |                      | SP175         | 27.30      | 18.50      | 45.80 |                      |         | SP175                | 41.10      | 11.40      | 52.50 |
|                      |                      | SMP180        | 26.70      | 14.10      | 40.80 |                      |         | SMP180               | 49.70      | 11.80      | 61.50 |
|                      |                      |               |            | av         | 47.44 |                      |         |                      | av         | 56.10      |       |
|                      |                      |               |            | SD         | 2.91  |                      |         |                      | sd         | 6.01       |       |
|                      | Aurein 2.6-COOH DMPS | CDSSTR        | 3.00       | 44.00      | 4.00  |                      | 48.00   | Aurein 2.6-CONH DMPS | CDSSTR     | 3.00       | 36.00 |
| 4.00                 |                      |               | 34.00      | 11.00      | 45.00 | 4.00                 | 40.00   |                      |            | 18.00      | 58.00 |
| 7.00                 |                      |               | 36.00      | 11.00      | 47.00 | 7.00                 | 41.00   |                      |            | 15.00      | 56.00 |
| SP175                |                      |               | 36.00      | 9.00       | 45.00 | SP175                | 41.00   |                      |            | 14.00      | 55.00 |
| SMP180               |                      |               | 39.00      | 19.00      | 58.00 | SMP180               | 29.00   |                      |            | 15.00      | 44.00 |
| CONTIN               |                      | 3.00          | 31.30      | 12.80      | 44.10 | CONTIN               | 3.00    |                      | 47.20      | 13.00      | 60.20 |
|                      |                      | 4.00          | 32.00      | 13.00      | 45.00 |                      | 4.00    |                      | 47.20      | 13.00      | 60.20 |
|                      |                      | 7.00          | 32.30      | 11.60      | 43.90 |                      | 7.00    |                      | 39.20      | 12.30      | 51.50 |
|                      |                      | SP175         | 32.80      | 11.80      | 44.60 |                      | SP175   |                      | 29.10      | 13.00      | 42.10 |
|                      |                      | SMP180        | 36.80      | 13.60      | 50.40 |                      | SMP180  |                      | 29.00      | 31.00      | 60.00 |
| SELCON3              |                      | 3.00          | 31.50      | 14.10      | 45.60 | SELCON3              | 3.00    |                      | 47.00      | 21.80      | 68.80 |
|                      |                      | 4.00          | 31.90      | 15.30      | 47.20 |                      | 4.00    |                      | 40.30      | 21.60      | 61.90 |
|                      |                      | 7.00          | 31.20      | 14.10      | 45.30 |                      | 7.00    |                      | 43.00      | 16.70      | 59.70 |
|                      |                      | SP175         | 28.60      | 13.00      | 41.60 |                      | SP175   |                      | 48.60      | 14.50      | 63.10 |
|                      |                      | SMP180        | 26.90      | 12.70      | 39.60 |                      | SMP180  |                      | 48.60      | 14.50      | 63.10 |
|                      |                      |               |            | av         | 46.02 |                      |         |                      | av         | 57.31      |       |
|                      |                      |               |            | SD         | 4.17  |                      |         |                      | sd         | 7.08       |       |

**Fig. 3** The CD secondary structure of aureins 2.6 in different lipid environment (DMPC and DMPS) fitted using CDSSTR, CONTIN and SELCON3.

| Peptide                     | Method  | Reference set | $\alpha 1$ | $\alpha 2$ | Total | Peptide | Method                      | Reference set | $\alpha 1$ | $\alpha 2$ | Total |       |       |
|-----------------------------|---------|---------------|------------|------------|-------|---------|-----------------------------|---------------|------------|------------|-------|-------|-------|
| Aurein 3.1-<br>COOH<br>DMPC | CDSSTR  |               | 3.00       | 34.00      | 7.00  | 41.00   | Aurein3.1-<br>CONH<br>DMPC  | CDSSTR        |            | 3.00       | 23.00 | 16.00 | 39.00 |
|                             |         |               | 4.00       | 35.00      | 12.00 | 47.00   |                             |               |            | 4.00       | 21.00 | 17.00 | 38.00 |
|                             |         |               | 7.00       | 35.00      | 13.00 | 48.00   |                             |               |            | 7.00       | 21.00 | 18.00 | 39.00 |
|                             |         | SP175         | 32.00      | 11.00      | 43.00 | SP175   |                             |               | 21.00      | 18.00      | 39.00 |       |       |
|                             |         | SMP180        | 37.00      | 10.00      | 47.00 | SMP180  |                             |               | 21.00      | 18.00      | 39.00 |       |       |
|                             | CONTIN  |               | 3.00       | 34.00      | 7.00  | 41.00   |                             | CONTIN        |            | 3.00       | 25.50 | 17.70 | 43.20 |
|                             |         |               | 4.00       | 35.00      | 12.00 | 47.00   |                             |               |            | 4.00       | 21.70 | 21.20 | 42.90 |
|                             |         |               | 7.00       | 35.00      | 13.00 | 48.00   |                             |               |            | 7.00       | 24.50 | 12.40 | 36.90 |
|                             |         | SP175         | 22.00      | 11.00      | 33.00 | SP175   |                             |               | 26.90      | 18.20      | 45.10 |       |       |
|                             |         | SMP180        | 27.00      | 11.00      | 38.00 | SMP180  |                             |               | 26.90      | 18.20      | 45.10 |       |       |
|                             | SELCON3 |               | 3.00       | 28.00      | 16.20 | 44.20   |                             | SELCON3       |            | 3.00       | 28.50 | 19.50 | 48.00 |
|                             |         |               | 4.00       | 28.50      | 17.30 | 45.80   |                             |               |            | 4.00       | 28.80 | 19.80 | 48.60 |
|                             |         |               | 7.00       | 28.40      | 17.20 | 45.60   |                             |               |            | 7.00       | 24.20 | 18.60 | 42.80 |
|                             |         | SP175         | 21.80      | 17.20      | 39.00 | SP175   |                             |               | 24.20      | 18.60      | 42.80 |       |       |
|                             |         | SMP180        | 25.70      | 12.70      | 38.40 | SMP180  |                             |               | 24.00      | 16.00      | 40.00 |       |       |
|                             |         |               | av         | 43.07      |       |         |                             | av            | 41.96      |            |       |       |       |
|                             |         |               | SD         | 4.51       |       |         |                             | SD            | 3.63       |            |       |       |       |
| Aurein 3.1-<br>COOH<br>DMPS | CDSSTR  |               | 3.00       | 29.00      | 11.00 | 40.00   | Aurein 3.1-<br>CONH<br>DMPS | CDSSTR        |            | 3.00       | 42.00 | 19.00 | 61.00 |
|                             |         |               | 4.00       | 27.00      | 16.00 | 43.00   |                             |               |            | 4.00       | 44.00 | 18.00 | 62.00 |
|                             |         |               | 7.00       | 28.00      | 15.00 | 43.00   |                             |               |            | 7.00       | 43.00 | 19.00 | 62.00 |
|                             |         | SP175         | 22.00      | 21.00      | 43.00 | SP175   |                             |               | 43.00      | 18.00      | 61.00 |       |       |
|                             |         | SMP180        | 25.00      | 24.00      | 49.00 | SMP180  |                             |               | 43.00      | 18.00      | 61.00 |       |       |
|                             | CONTIN  |               | 3.00       | 31.80      | 19.70 | 51.50   |                             | CONTIN        |            | 3.00       | 56.50 | 12.00 | 68.50 |
|                             |         |               | 4.00       | 28.20      | 17.70 | 45.90   |                             |               |            | 4.00       | 56.40 | 13.70 | 70.10 |
|                             |         |               | 7.00       | 28.70      | 16.50 | 45.20   |                             |               |            | 7.00       | 56.20 | 12.70 | 68.90 |
|                             |         | SP175         | 25.40      | 16.20      | 41.60 | SP175   |                             |               | 54.40      | 12.40      | 66.80 |       |       |
|                             |         | SMP180        | 25.10      | 14.20      | 39.30 | SMP180  |                             |               | 55.20      | 0.99       | 56.19 |       |       |
|                             | SELCON3 |               | 3.00       | 22.40      | 23.00 | 45.40   |                             | SELCON3       |            | 3.00       | 41.50 | 18.40 | 59.90 |
|                             |         |               | 4.00       | 22.40      | 23.00 | 45.40   |                             |               |            | 4.00       | 48.00 | 17.60 | 65.60 |
|                             |         |               | 7.00       | 23.90      | 23.60 | 47.50   |                             |               |            | 7.00       | 47.90 | 17.40 | 65.30 |
|                             |         | SP175         | 11.60      | 20.00      | 31.60 | SP175   |                             |               | 43.60      | 17.30      | 60.90 |       |       |
|                             |         | SMP180        | 11.60      | 20.00      | 31.60 | SMP180  |                             |               | 47.20      | 15.20      | 62.40 |       |       |
|                             |         |               | av         | 42.87      |       |         |                             | av            | 63.44      |            |       |       |       |
|                             |         |               | SD         | 5.59       |       |         |                             | SD            | 3.91       |            |       |       |       |

Fig. 4 The CD secondary structure of aureins 2.6 in different lipid environment (DMPC and DMPS) fitted using CDSSTR, CONTIN and SELCON3.

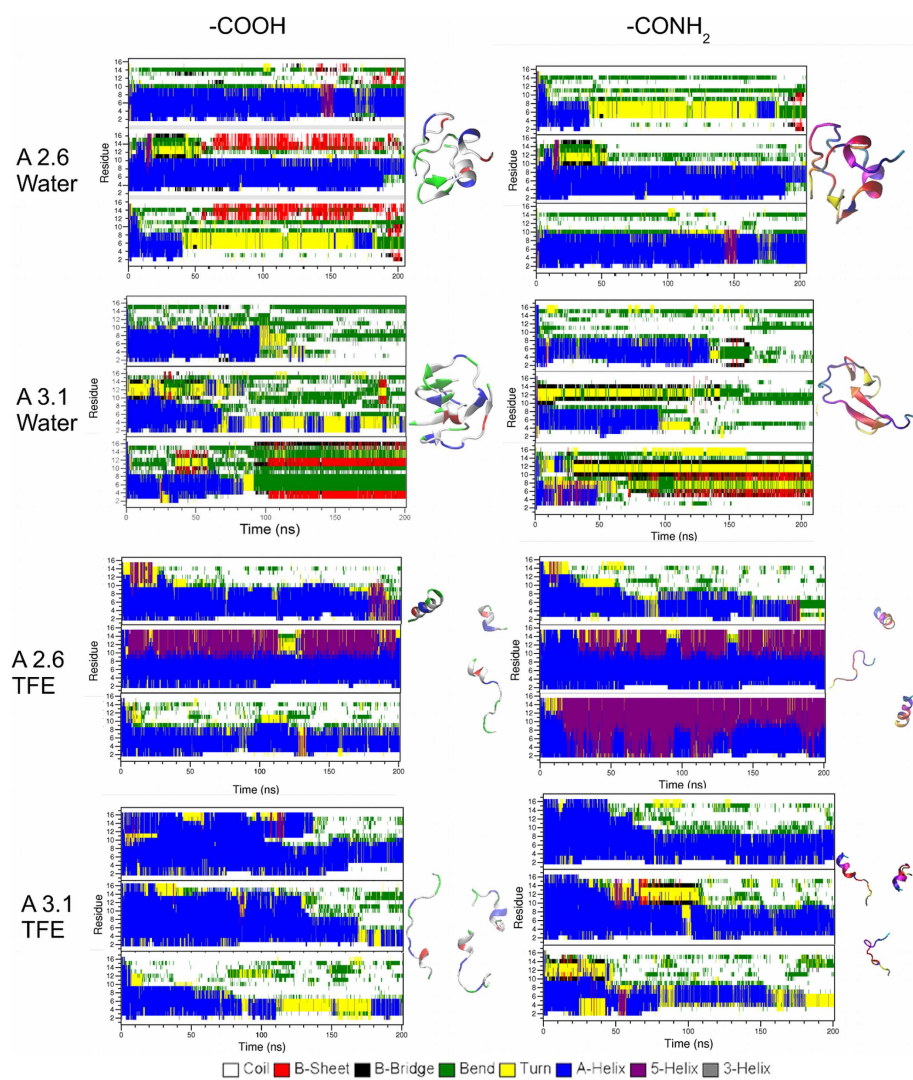

**Fig. 5** Time evolution of the secondary structure of the peptides in presence of solution during the 200ns.

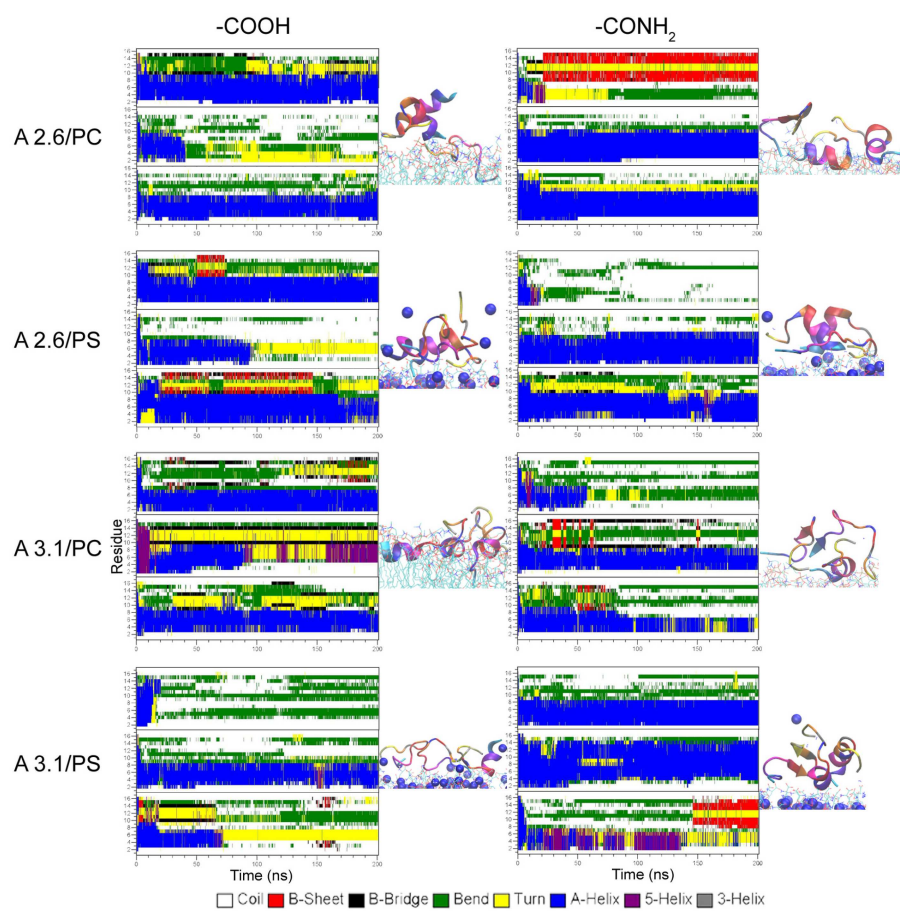

**Fig. 6** Time evolution of the secondary structure of the peptides outside the lipid bilayer during the 200ns.

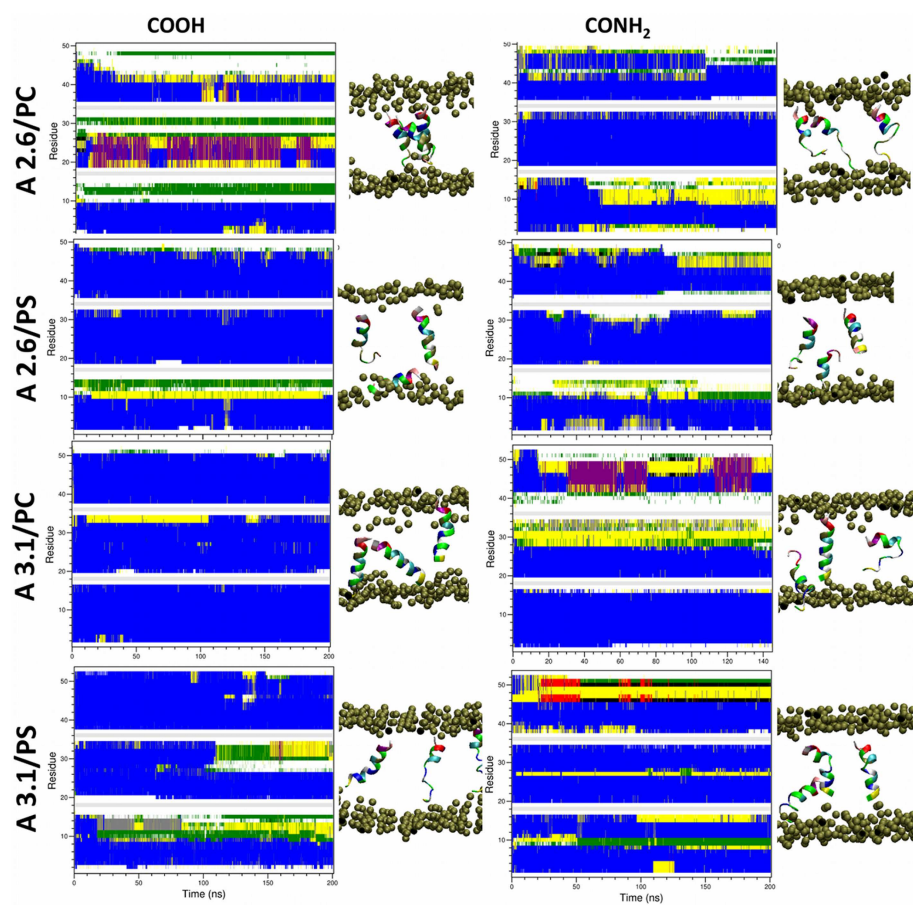

Fig. 7 Time evolution of the secondary structure of the peptides inside the lipid bilayer during the 200ns.



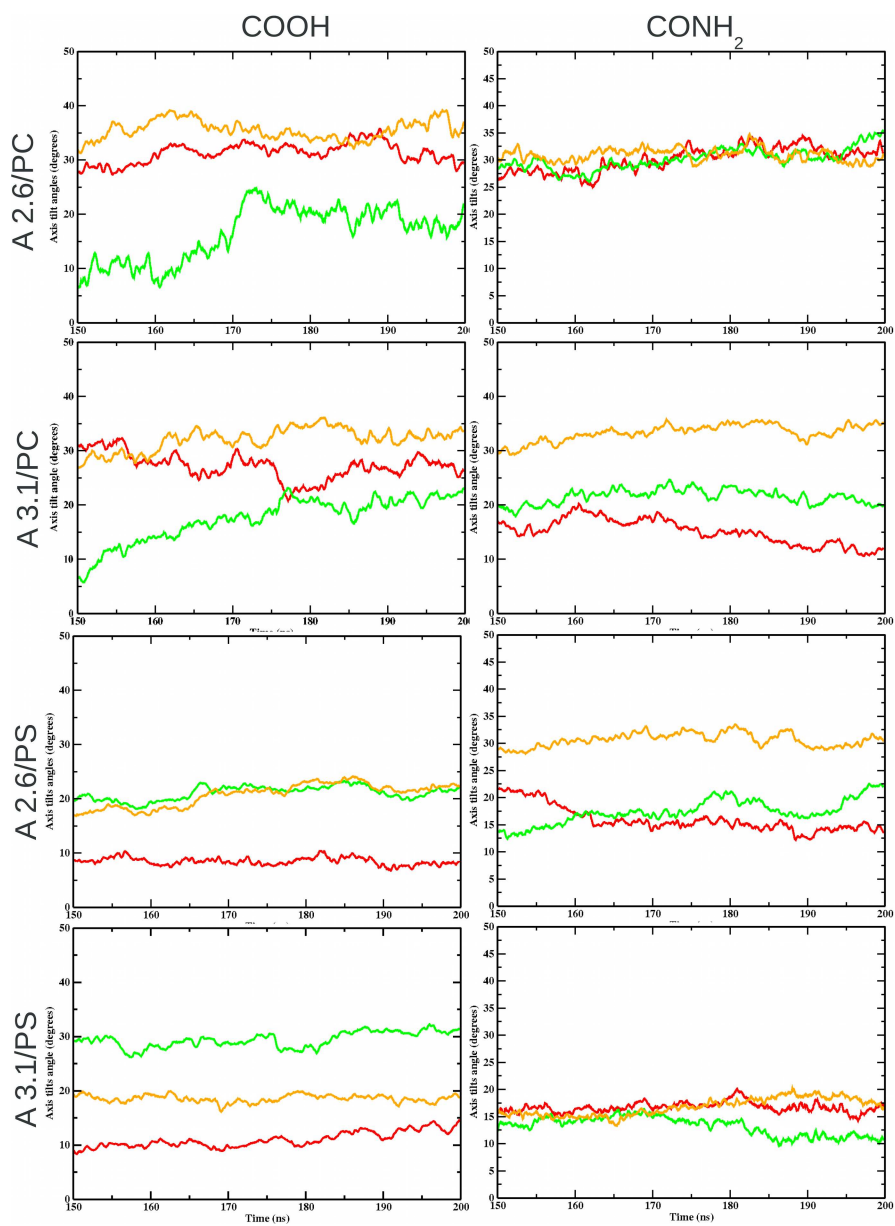

**Fig. 8** Profile of the behaviour of angle between the long axis for the peptide A (red line), peptide B (green line), peptide C (orange line) of the aurein 2.6 and aurein 3.1 and the bilayer surface (DMPC and DMPS).
